# Supplementary material for: Reprogramming Synthetic Cells for Targeted Cancer Therapy
Source: PubMed Central journal article supplement (PMC9084601; doi:10.1021/acssynbio.1c00631), 2022-03-08
Supplement: sb1c00631_si_001.pdf [file sb1c00631_si_001.pdf]

## Supplementary information

### Reprogramming Synthetic Cells for Targeted Cancer Therapy

Boon Lim<sup>1,2#</sup>, Yutong Yin<sup>1#</sup>, Hua Ye<sup>1,2</sup>, Zhanfeng Cui<sup>1,2</sup>, Antonis Papachristodoulou<sup>1</sup>, Wei E Huang<sup>1,\*</sup>

<sup>1</sup>*Department of Engineering Science, University of Oxford, Parks Road, OX1 3PJ, Oxford, UK.*

<sup>2</sup>*Institute of Biomedical Engineering, Department of Engineering Science, University of Oxford, OX3 7DQ, UK.*

\*Corresponding author: Department of Engineering Science, University of Oxford, Parks Road, OX1 3PJ, Oxford, United Kingdom. Email [wei.huang@eng.ox.ac.uk](mailto:wei.huang@eng.ox.ac.uk) Tel: +44 1865 283786.

# B.L. and Y.Y contributed equally to this work.

**Table S1.** Bacterial strains and plasmids used in this study.

| Strains                              | Genotype or description                                                                                                     | Source         |
|--------------------------------------|-----------------------------------------------------------------------------------------------------------------------------|----------------|
| <i>Escherichia coli</i> DH5 $\alpha$ | <i>fhuA2 lac(del)U169 phoA glnV44 <math>\Phi</math>80' lacZ(del)M15 gyrA96 recA1 relA1 endA1 thi-1 hsdR17</i>               | Lab collection |
| <i>E. coli</i> BL21(DE3)             | <i>fhuA2 [lon] ompT gal (<math>\lambda</math> DE3) [dcm] <math>\Delta</math>hsdS</i>                                        | Lab collection |
| <i>E. coli</i> K12 MDS42             | <i>fhuACDB(del) endA(del)</i> and deletion of all IS and cryptic prophage <sup>1</sup>                                      | Lab collection |
| DH5 $\alpha$ pNVC17                  | BL21(DE3): pNVC17 (for cloning)                                                                                             | This study     |
| BL21(DE3) pNVC17_2                   | BL21(DE3): pNVC17_2 (low expression profile)                                                                                | This study     |
| BL21(DE3) pNVC43_2                   | BL21(DE3): pNVC43_2 (low expression profile)                                                                                | This study     |
| BL21(DE3) pNVCYT_2                   | BL21(DE3): pNVCYT_2 (low expression profile)                                                                                | This study     |
| BL21(DE3) pNVC17_3                   | BL21(DE3): pNVC17_3 (high expression profile)                                                                               | This study     |
| BL21(DE3) pNVC43_3                   | BL21(DE3): pNVC43_3 (high expression profile)                                                                               | This study     |
| BL21(DE3) pNVCYT_3                   | BL21(DE3): pNVCYT_3 (high expression profile)                                                                               | This study     |
| BL21(DE3) control                    | BL21(DE3): proD_sfGFP (high expression profile control with sfGFP)                                                          | This study     |
| BL21(DE3) pNVC17_sfGFP               | BL21(DE3): pNVC17_sfGFP (high expression profile with sfGFP downstream)                                                     | This study     |
| BL21(DE3) pNVC43_sfGFP               | BL21(DE3): pNVC43_sfGFP (high expression profile with sfGFP downstream)                                                     | This study     |
| BL21(DE3) pNVCYT_sfGFP               | BL21(DE3): pNVCYT_sfGFP (high expression profile with sfGFP downstream)                                                     | This study     |
| BL21(DE3) pNVC17_sfGFP_ICeul         | BL21(DE3): pNVC17_sfGFP + pRH12x (high expression profile with sfGFP downstream; ICeul endonuclease expression)             | This study     |
| BL21(DE3) pNVC43_sfGFP_ICeul         | BL21(DE3): pNVC43_sfGFP + pRH12x (high expression profile with sfGFP downstream; ICeul endonuclease expression)             | This study     |
| BL21(DE3) pNVC43_SalA_sfGFP_ICeul    | BL21(DE3): pNVC43_salA_sfGFP + pRH12x (high expression profile with sfGFP downstream; ICeul endonuclease expression)        | This study     |
| BL21(DE3) pNVCYT_sfGFP_ICeul         | BL21(DE3): pNVCYT_sfGFP + pRH12x (high expression profile with sfGFP downstream; ICeul endonuclease expression)             | This study     |
| BL21(DE3) pSIJ8                      | BL21(DE3): pSIJ8 (for recombination engineering)                                                                            | This study     |
| BL21(DE3) $\Delta$ minD              | BL21(DE3) $\Delta$ minD::Kan <sup>R</sup> (for minicells generation)                                                        | This study     |
| BL21(DE3) $\Delta$ minD pNVC17_sfGFP | BL21(DE3): pNVC17_sfGFP, $\Delta$ minD::Kan <sup>R</sup> (for minicells with high expression profile with sfGFP downstream) | This study     |
| BL21(DE3) $\Delta$ minD pNVC43_sfGFP | BL21(DE3): pNVC43_sfGFP, $\Delta$ minD::Kan <sup>R</sup> (for minicells with high expression profile with sfGFP downstream) | This study     |

|                                         |                                                                                                                                                                      |                                                 |
|-----------------------------------------|----------------------------------------------------------------------------------------------------------------------------------------------------------------------|-------------------------------------------------|
| BL21(DE3) $\Delta minD$<br>pNVCYT_sfGFP | BL21(DE3): pNVCYT_sfGFP, $\Delta minD::Kan^R$<br>(for minicells with high expression profile with<br>sfGFP downstream)                                               | This study                                      |
| <b>Plasmids</b>                         |                                                                                                                                                                      |                                                 |
| pNVgfp                                  | Plasmid with anti-GFP nanobody attached to<br>$\beta$ -intimin, constitutively expressed by the<br>promoter BBa_J23106 and a low strength<br>RBS (12K TIR). $Cm^R$ . | A gift from<br>Dr Karen<br>Polizzi <sup>2</sup> |
| pNVC17                                  | Anti-GFP nanobody of pNVgfp replaced by<br>anti-CEA nanobody. $Cm^R$ .                                                                                               | This study                                      |
| pNVC43                                  | Anti-GFP nanobody of pNVgfp replaced by<br>another variant of anti-CEA nanobody. $Cm^R$ .                                                                            | This study                                      |
| pNVC17_2                                | BBa_J23106 of pNVC17 replaced by<br>BBa_J23105. $Cm^R$ .                                                                                                             | This study                                      |
| pNVC43_2                                | BBa_J23106 of pNVC43 replaced by<br>BBa_J23105. $Cm^R$ .                                                                                                             | This study                                      |
| pNVCYT_2                                | Anti-CEA nanobody of pNVC17_2 replaced<br>by anti-spike protein nanobody. $Cm^R$ .                                                                                   | This study                                      |
| pNVC17_3                                | BBa_J23106 and RBS of pNVC17 replaced<br>by BBa_K1741014 and BBa_K1758100,<br>respectively.                                                                          | This study                                      |
| pNVC43_3                                | Anti-CEA nanobody of pNVC17_3 replaced<br>by another anti-CEA nanobody variant. $Cm^R$ .                                                                             | This study                                      |
| pNVCYT_3                                | Anti-CEA nanobody of pNVC17_3 replaced<br>by anti-spike protein nanobody. $Cm^R$ .                                                                                   | This study                                      |
| pNVC17_sfGFP                            | BBa_K1758100 and <i>sfGFP</i> cloned<br>downstream to the anti-CEA nanobody in<br>pNVC17_3. $Cm^R$ .                                                                 | This study                                      |
| pNVC43_sfGFP                            | Anti-CEA nanobody of pNVC17_sfGFP<br>replaced by another anti-CEA nanobody<br>variant. $Cm^R$ .                                                                      | This study                                      |
| pNVC43_SalA_sfGFP                       | <i>salA</i> cloned upstream of <i>sfGFP</i> within<br>pNVC43_sfGFP. $Cm^R$ .                                                                                         | This study                                      |
| pNVCYT_sfGFP                            | Anti-CEA nanobody of pNVC17_sfGFP<br>replaced by anti-spike protein nanobody.<br>$Cm^R$ .                                                                            | This study                                      |
| prod_sfGFP                              | A lab plasmid with BBa_K1741014 and<br>BBa_K1758100 upstream of a <i>sfGFP</i> . $Cm^R$ .                                                                            | Lab<br>collection                               |
| pJKR-L-TetR-ICeul                       | Plasmid with I-Ceul endonuclease controlled<br>by TetR. $Carb^R$ .                                                                                                   | <sup>3</sup>                                    |
| pRH12x                                  | Plasmid with ICeul endonuclease controlled<br>by a crystal violet inducible promoter. $Kan^R$ .                                                                      | This study                                      |
| pSIJ8                                   | Plasmid with lambda Red recombineering<br>genes ( <i>exo</i> , <i>bet</i> and <i>gam</i> ) and a flippase<br>(FLP) recombinase. $Carb^R$ .                           | <sup>4</sup>                                    |

**Table S2.** Primers and gene blocks used in this study.

| Primers | Sequence (5' → 3')                             | Part/Purpose         | Plasmid                                     |
|---------|------------------------------------------------|----------------------|---------------------------------------------|
| VHH-for | GAACCGGCCAGCCGGCCGAAGTTCAAC<br>TGGTTGAAAG      | Anti-CEA<br>nanobody | pNVC17,<br>pNVC43,<br>pNVC17_2,<br>pNVC43_2 |
| VHH-rev | GATGAGTTTTTGTTCGGCGGCCGCGCTG<br>CTAACTGTAACCTG |                      |                                             |

|                         |                                                                                                                                                                                                                                                                                                                                                                                                                          |                                             |                                                            |
|-------------------------|--------------------------------------------------------------------------------------------------------------------------------------------------------------------------------------------------------------------------------------------------------------------------------------------------------------------------------------------------------------------------------------------------------------------------|---------------------------------------------|------------------------------------------------------------|
| pNV-for                 | GCTCGAGCCGAACAAAACTCATCTCAGA<br>AGAGGATGCAGCTGC                                                                                                                                                                                                                                                                                                                                                                          | pNVgfp<br>backbone                          | pNVC17,<br>pNVC43,<br>pNVC17_2,<br>pNVC43_2,<br>pNVCYT_2   |
| pNV-rev                 | GGCCGGCTGGGCCGGTTCCAGC                                                                                                                                                                                                                                                                                                                                                                                                   |                                             |                                                            |
| pNV-3-<br>for           | ATGATTACTCATGGTTGTTATACCCGG                                                                                                                                                                                                                                                                                                                                                                                              | pNVC17<br>backbone                          | pNVC17_3,<br>pNVC43_3,<br>pNVCYT_3                         |
| pNV-3-<br>rev           | GCACACGGTCACACTGCTTC                                                                                                                                                                                                                                                                                                                                                                                                     |                                             |                                                            |
| pNV-<br>sfGFP-<br>for   | GCATGGATGAGCTCTACAAAAGCTTGAC<br>CTGTGAAGTG                                                                                                                                                                                                                                                                                                                                                                               | pNVC17_3<br>backbone                        | pNVC17_sfGF<br>P,<br>pNVC43_sfGF<br>P,<br>pNVCYT_sfG<br>FP |
| pNV-<br>sfGFP-<br>rev   | ATGGTACCTTTCTCCTCTTTTTATGCAGCT<br>GCATCCTC                                                                                                                                                                                                                                                                                                                                                                               |                                             |                                                            |
| sfGFP-<br>for           | AAAGAGGAGAAAGGTACCATGAGCAAAG                                                                                                                                                                                                                                                                                                                                                                                             | sfGFP                                       | pNVC17_sfGF<br>P,<br>pNVC43_sfGF<br>P,<br>pNVCYT_sfG<br>FP |
| sfGFP-<br>rev           | TTTGTAGAGCTCATCCATGCCATGTG                                                                                                                                                                                                                                                                                                                                                                                               |                                             |                                                            |
| minD-<br>HR-Kan-<br>for | GTTGGCTGTGTTTTCTTCCGCGAGAGAA<br>AGAAATCGAGTAATGCCATAACTTAGAAA<br>AACTCATCGAGCATCAAATG                                                                                                                                                                                                                                                                                                                                    | Kanamycin<br>resistance<br>gene<br>cassette | -                                                          |
| minD-<br>HR-Kan-<br>rev | CGCTTTGACCGTTCAACCGTTAAATTGAT<br>CCCTTTTTAACAAAGGAATTTCTATGAGCCA<br>TATTCAACGGGAAAC                                                                                                                                                                                                                                                                                                                                      |                                             |                                                            |
| HR-<br>check-for        | GACCTCAAGAATATCTTTACGCAACTG                                                                                                                                                                                                                                                                                                                                                                                              | Check for<br>success<br>recombinatio<br>n   | -                                                          |
| HR-<br>check-<br>rev    | CTGTTTGTAATTGTCCTTTTAAACAGCG                                                                                                                                                                                                                                                                                                                                                                                             |                                             |                                                            |
| <b>Gene blocks</b>      |                                                                                                                                                                                                                                                                                                                                                                                                                          |                                             |                                                            |
| VHH-<br>C17             | GAAGTTCAACTGGTTGAAAGCGGTGGTG<br>GTTTTGTTTCAGGCAGGCGAAAGTCTGACC<br>CTGAGCTGTACCAGCAGCACCTGACCTT<br>TACACCGTATCGTATGGCATGGTATCGTC<br>AGGCACCGGGTAAACAGCGTGATCTGGT<br>TGCAGATATTAGCAGCGGTGATGGTCGTA<br>CCACCAATTATGCAGATTTTGCCAAAGGT<br>CGTTTTACCATTAGCCGTGACAATATCAA<br>AAACACCGTTTTTCTGCGTATGACCAATC<br>TGAAACCGGAAGATACCGCAGTGTATTAT<br>TGTAATACCTTTGTGAGCTTTGTGGGTATT<br>GCACGTAGCTGGGGTCAGGGCACCCAGG<br>TTACAGTTAGCAGC | Anti-CEA nanobody <sup>5</sup>              |                                                            |
| VHH-<br>C43             | GAAGTTCAACTGGTTGAAAGCGGTGGTG<br>GTCTGGTTCAGGCAGGCGGTAGTCTGAC<br>CCTGAGCTGTACCAGCAGCACCTGACC<br>TTTACACCGTATCGTATGGGTTGGTATCG<br>TCAGACACCGGGTAAACAGCGTGATCTG<br>GTTGCAGATATTAGCCCTGGTGATGGTAG<br>CACCAAAAATATGCAGGTTTTGCACAGG                                                                                                                                                                                            | Anti-CEA nanobody <sup>6</sup>              |                                                            |

|              |                                                                                                                                                                                                                                                                                                                                                                                                                    |                                          |
|--------------|--------------------------------------------------------------------------------------------------------------------------------------------------------------------------------------------------------------------------------------------------------------------------------------------------------------------------------------------------------------------------------------------------------------------|------------------------------------------|
|              | GTCGTTTTACCATTAGCCGTGATAATATCA<br>AAAACACCGTT<br>TACCTGCAGATGAACGATCTGAAACCGGA<br>AGATACCGCAGTGTATTATTGTAATACCTA<br>TGTTGCCTTTGTTGGTCGTGCACGTACCT<br>GGGGTCAGGGCACCCAGGTTACAGTTAG<br>CAGC                                                                                                                                                                                                                          |                                          |
| VHH-<br>CYT  | CAGGTGCAGCTCGTGGAGACGGGGGGA<br>GGCTTGGTGCAGCCTGGGGGGTCTCTGA<br>GACTCTCCTGTGCAGCCTCTGGATTCACC<br>TTCAGTAGCGTCTACATGAACTGGGTCCG<br>CCAGGCTCCAGGGAAGGGGCCCGAGTG<br>GGTCTCGCGTATTAGTCCGAATAGTGGTA<br>ATATTGGGTATACAGACTCCGTGAAGGGC<br>CGATTCACCATCTCCAGAGACAACGCCAA<br>GAACACACTGTATCTGCAAATGAATAACC<br>TGAAACCTGAGGACACGGCCCTGTATTAC<br>TGTGCGATTGGTTTGAATTTGAGTAGTAG<br>CTCCGTTAGGGGCCAGGGGACCCAGGTC<br>ACCGTCTCCTCA | Anti-Spike protein nanobody <sup>7</sup> |
| proD-<br>g10 | CACAGCTAACACCACGTCGTCCCTATCTG<br>CTGCCCTAGGTCTATGAGTGGTTGCTGGA<br>TAACTTTACGGGCATGCATAAGGCTCGTA<br>TAATATATTCAGGGAGACCACAACGGTTT<br>CCCTCTACAAATAATTTTGTTTAACTTTGA<br>ATTCAAAGATCTTTAACTTTAAGAAGGAG<br>ATATACAT                                                                                                                                                                                                    | BBa_K1741014 and<br>BBa_K1758100         |

a

Created with SnapGene®

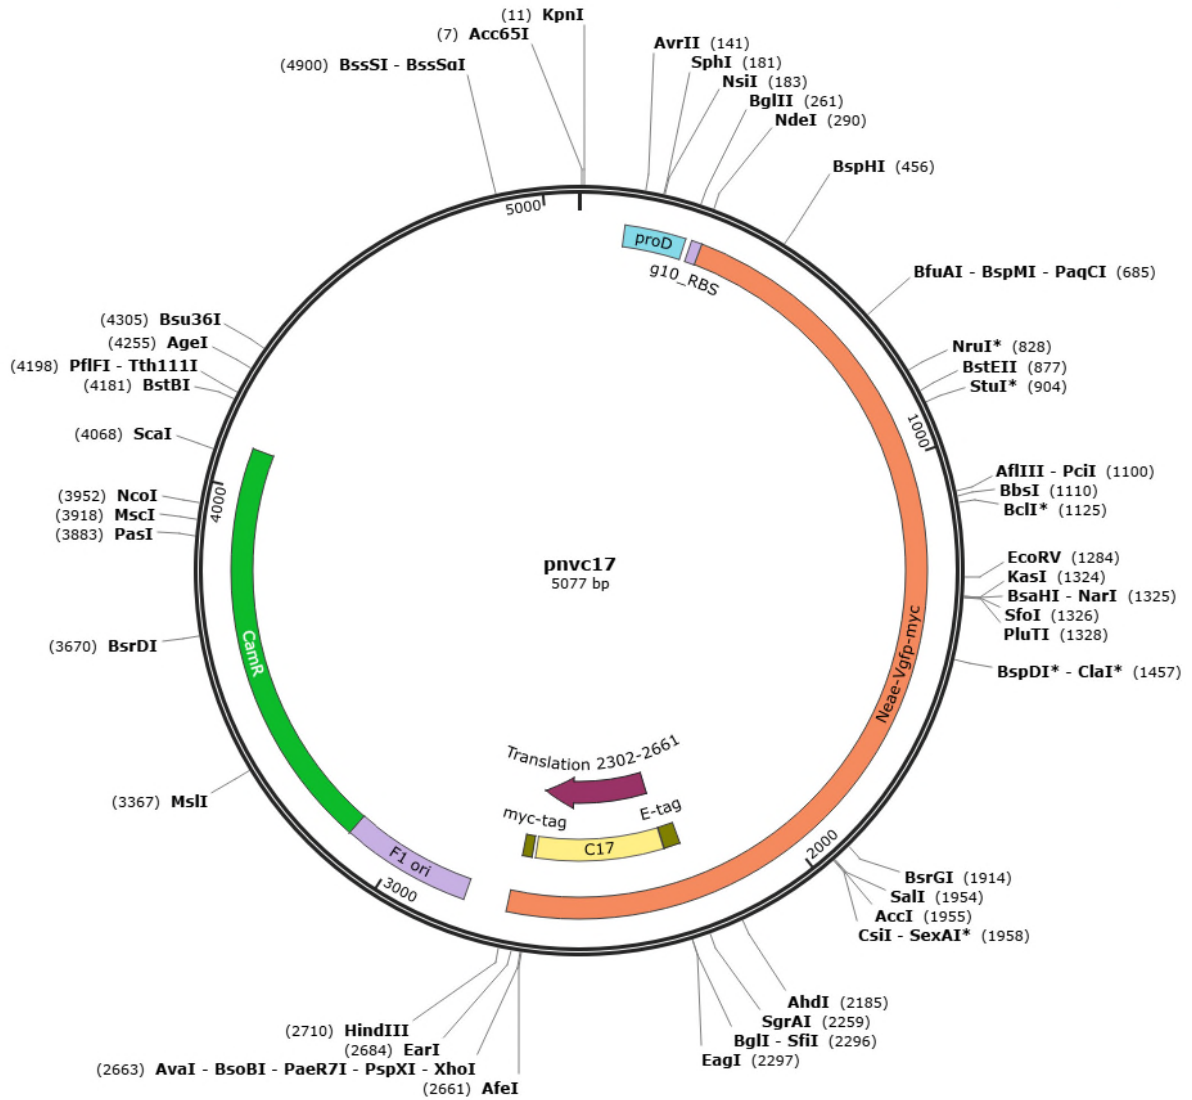

**b**

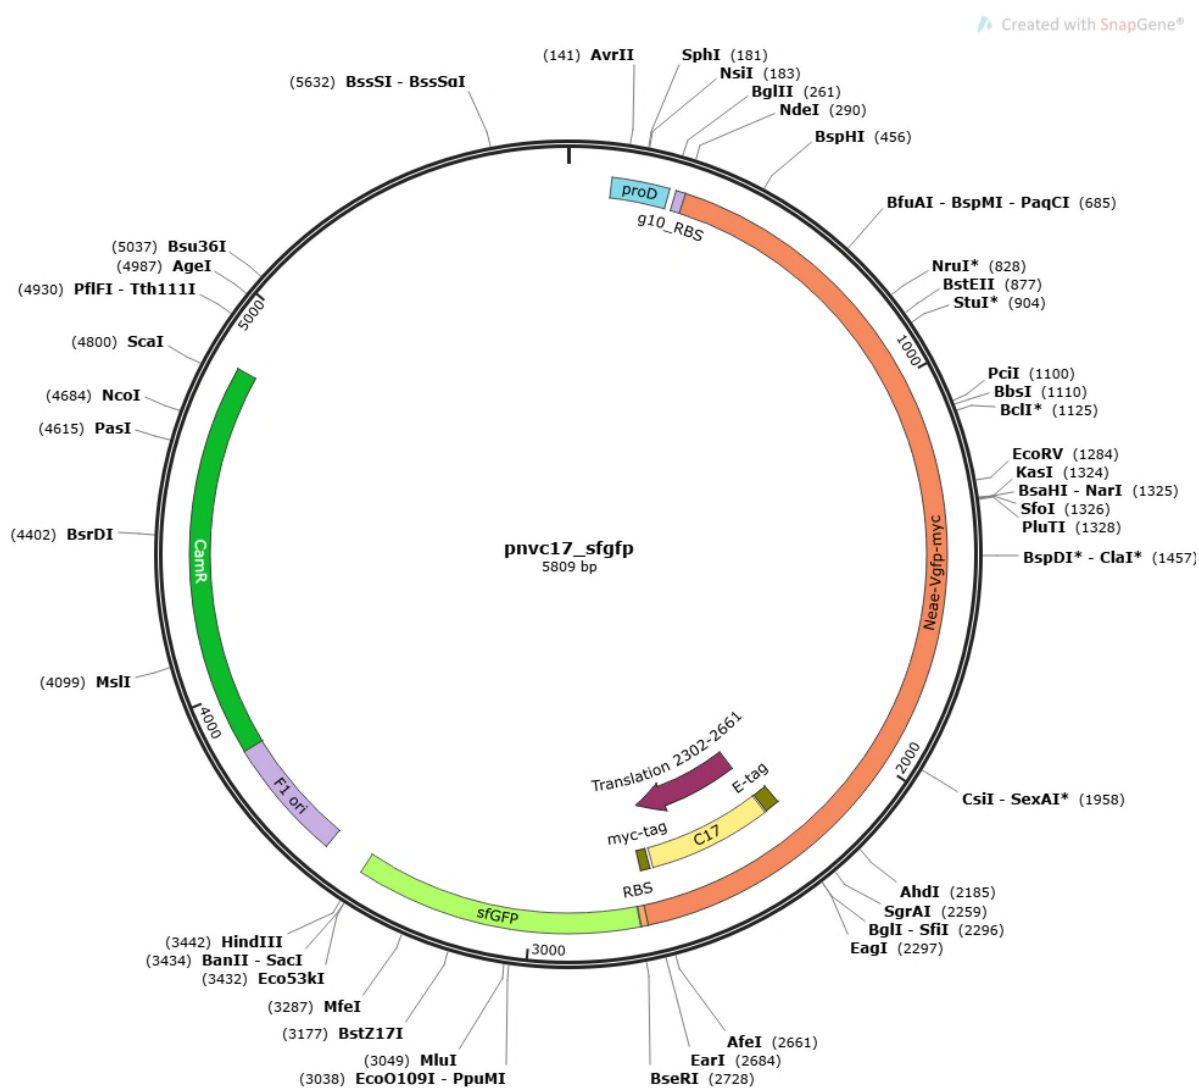

**Figure S1.** Plasmid map of (a) pNVC17 and (b) pNVC17\_sfGFP plasmids. The promoter (proD), ribosome binding site (g10\_RBS) and nanobody (C17) are interchangeable with other parts listed in Table S2.

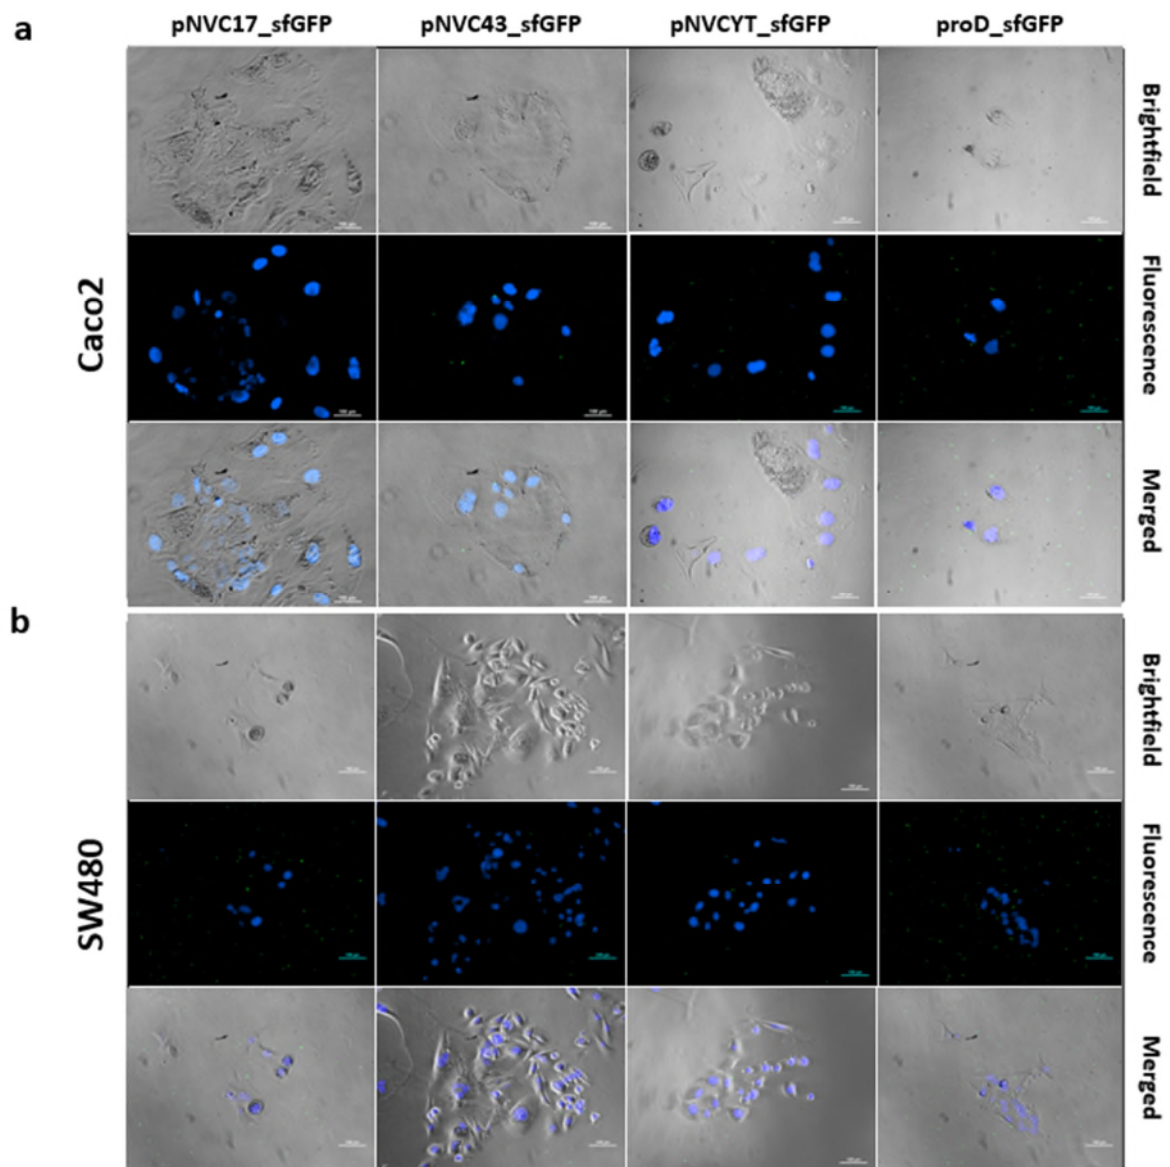

**Figure S2.** Time 0 hour (within ~5 minutes) incubation of engineered *E. coli* carrying different pNV plasmids with sfGFP (green) with two different colorectal cancer cell lines: **(a)** Caco2, a high CEA expressing cell line and **(b)** SW480, a low CEA expressing cell. Nuclei of cancer cells are stained with Hoechst dye (blue). Scale bar is 100  $\mu$ m.



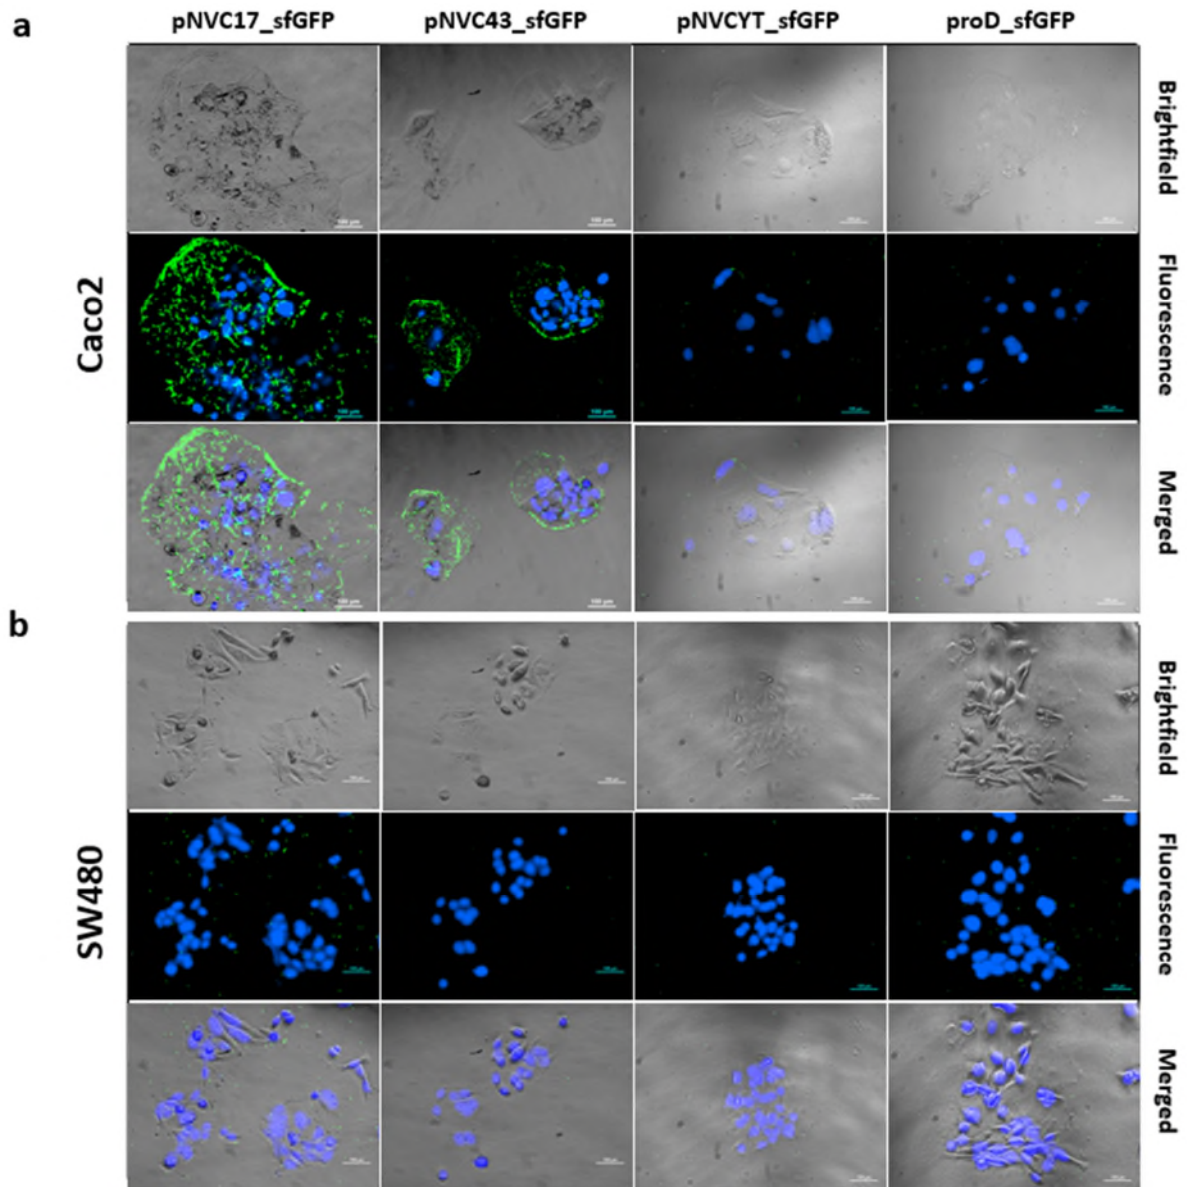

**Figure S3.** Time 4 hours incubation of engineered *E. coli* carrying different pNV plasmids with sfGFP (green) with two different colorectal cancer cell lines: **(a)** Caco2, a high CEA expressing cell line and **(b)** SW480, a low CEA expressing cell. Nuclei of cancer cells are stained with Hoechst dye (blue). Scale bar is 100  $\mu$ m.

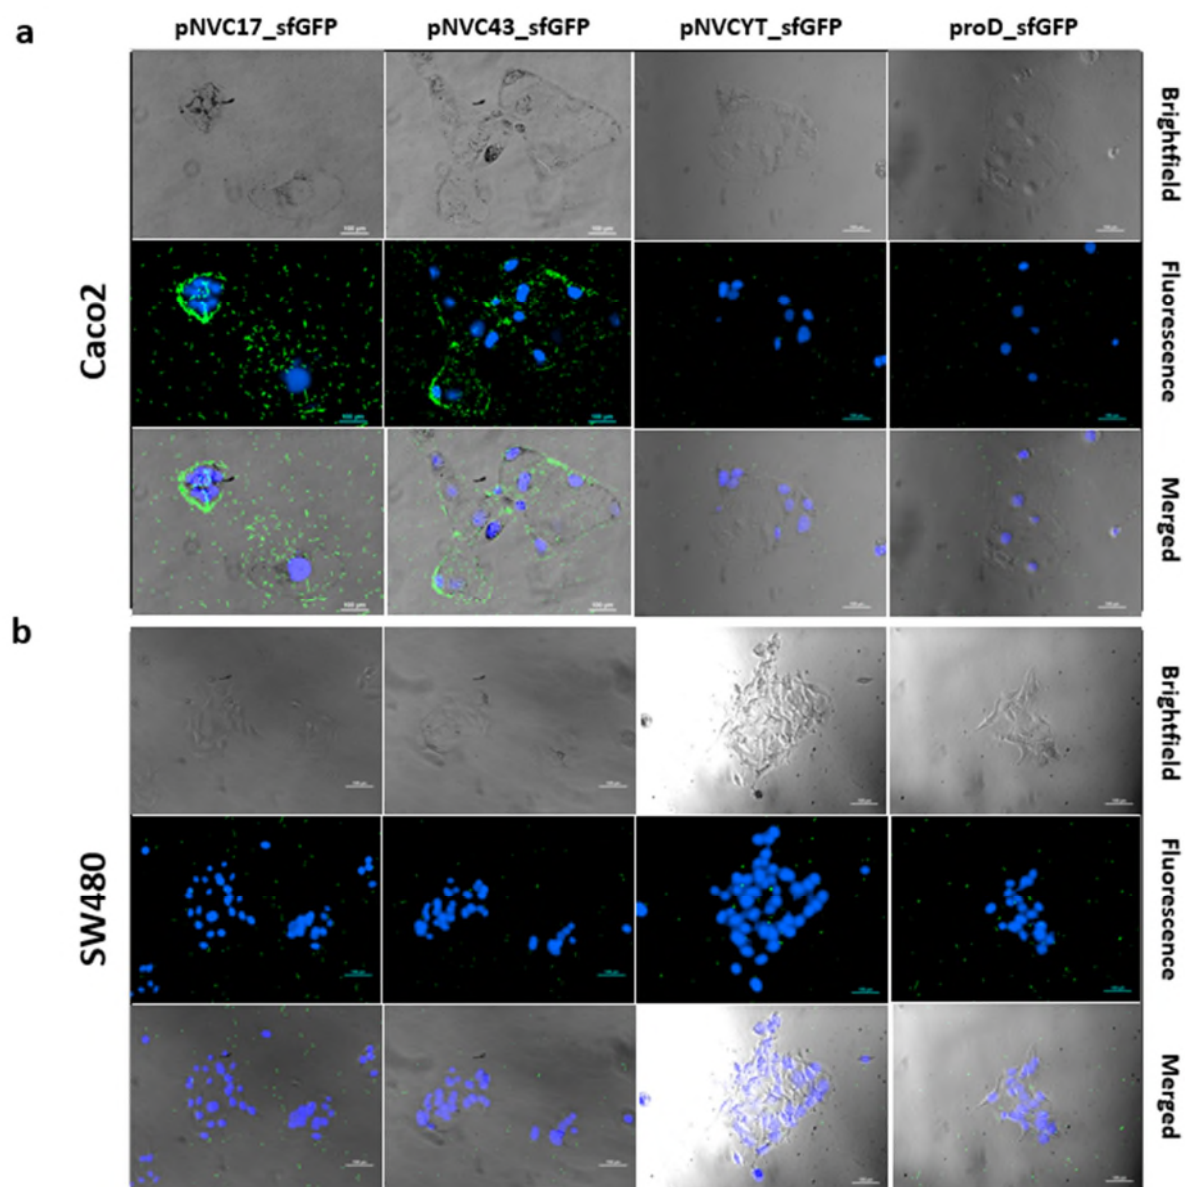

**Figure S4.** Time 8 hours incubation of engineered *E. coli* carrying different pNV plasmids with sfGFP (green) with two different colorectal cancer cell lines: **(a)** Caco2, a high CEA expressing cell line and **(b)** SW480, a low CEA expressing cell. Nuclei of cancer cells are stained with Hoechst dye (blue). Scale bar is 100  $\mu$ m.

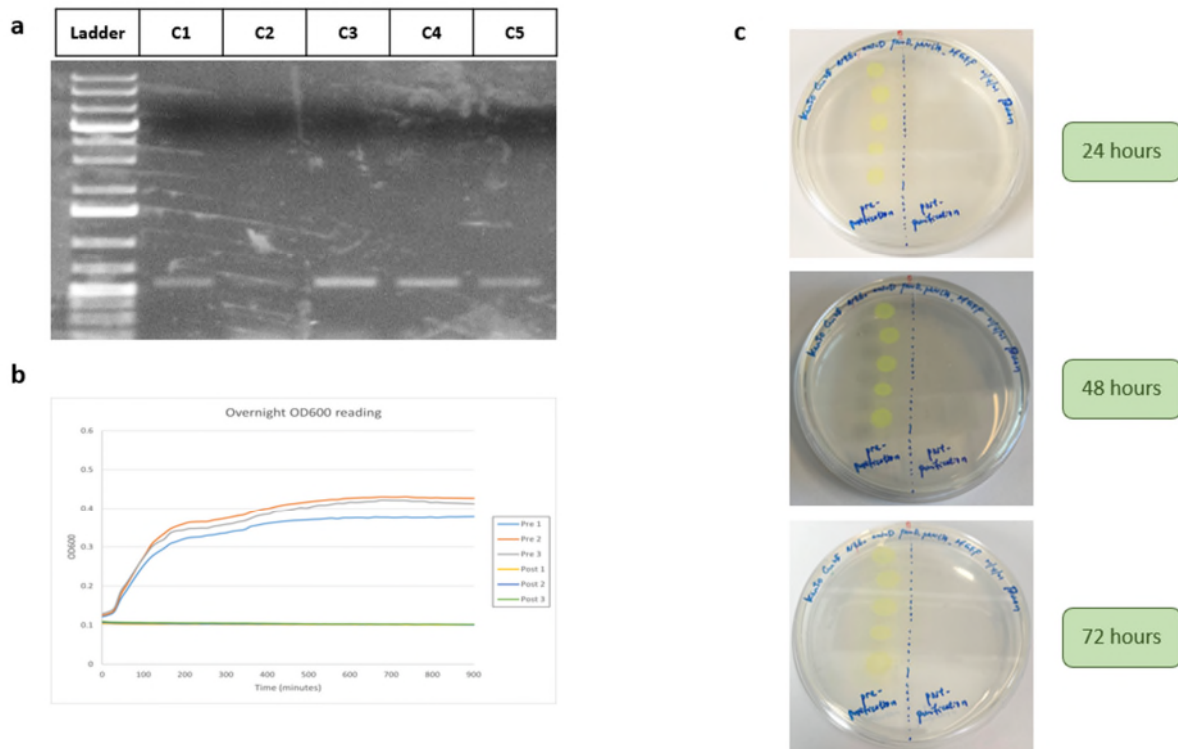

**Figure S5. (a)** Gel electrophoresis of PCR products from five different colonies (C1-C5) with successful *minD* knock out. The primers used were *minD*-HR-Kan-for and *minD*-HR-Kan-rev (Table S2), which anneal to the inserted Kanamycin cassette and the *minE* gene within the bacterial genome, respectively. The length of PCR product is 563 bp. The ladder used is a 1kb plus DNA ladder from NEB. **(b)** Overnight OD<sub>600</sub> reading of pre-purification culture (pre 1, 2, 3) and post-purification culture (post 1, 2, 3) of minicells. Each line represents a single biological repeat. **(c)** Pre-purification and post-purification minicell culture plated on LB-Kan-Cm agar for 24 hours (top), 48 hours (mid) and 72 hours (bottom) at 37 °C.

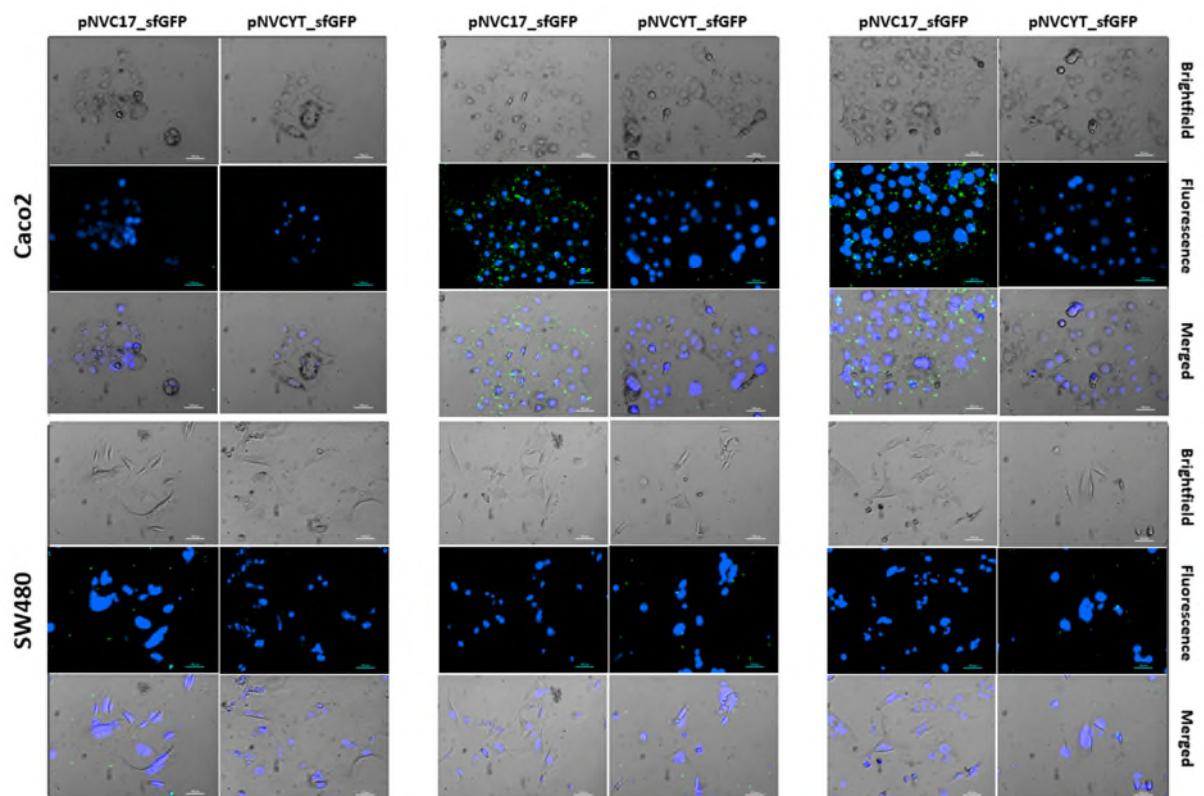

**Figure S6.** Time at 0 (left), 4 (mid) and 8 (right) hours incubation of engineered minicells carrying pNVC17\_sfGFP or pNVCYT\_sfGFP plasmids (green) with two different colorectal cancer cell lines: **(a)** Caco2, a high CEA expressing cell line and **(b)** SW480, a low CEA expressing cell. Nuclei of cancer cells are stained with Hoechst dye (blue). Scale bar is 100  $\mu$ m.

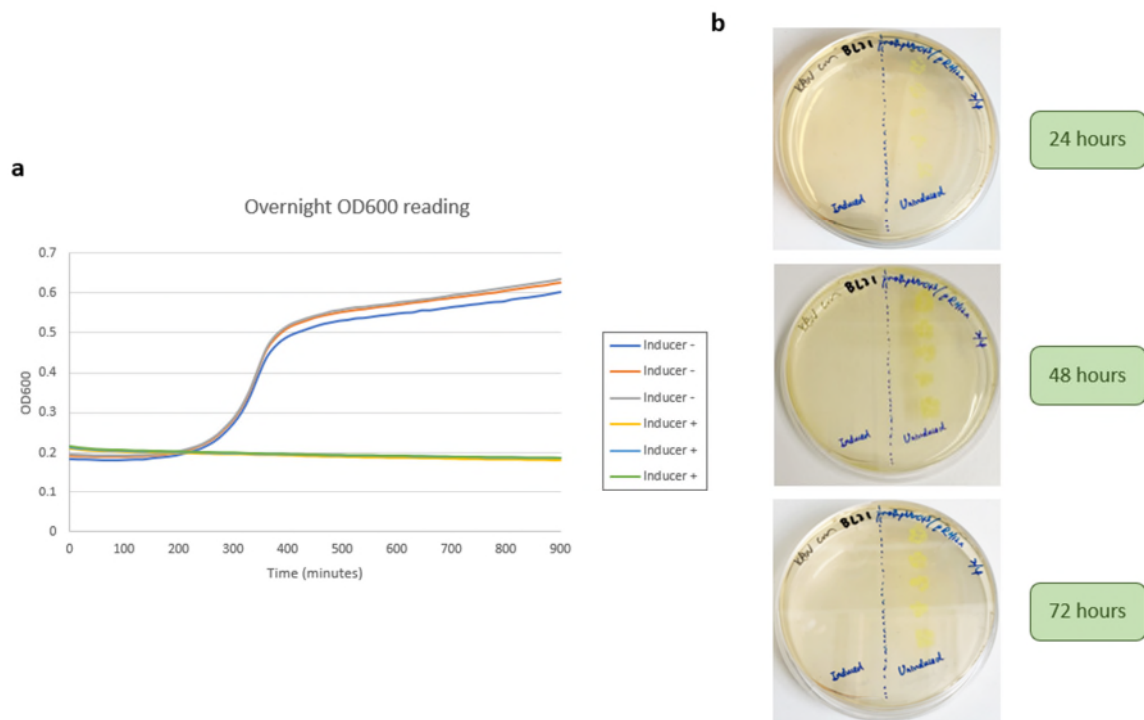

**Figure S7. (a)** Overnight OD600 reading of SimCell pYB1 carrying pNVC43\_sfGFP after two hours induction of inducer cocktail X (inducer +) or without inducer (inducer -). Each line represents a single biological repeat. **(b)** Induced and uninduced SimCell pYB1 culture plated on LB-Kan-Cm agar for 24 hours (top), 48 hours (mid) and 72 hours (bottom) at 37 °C.



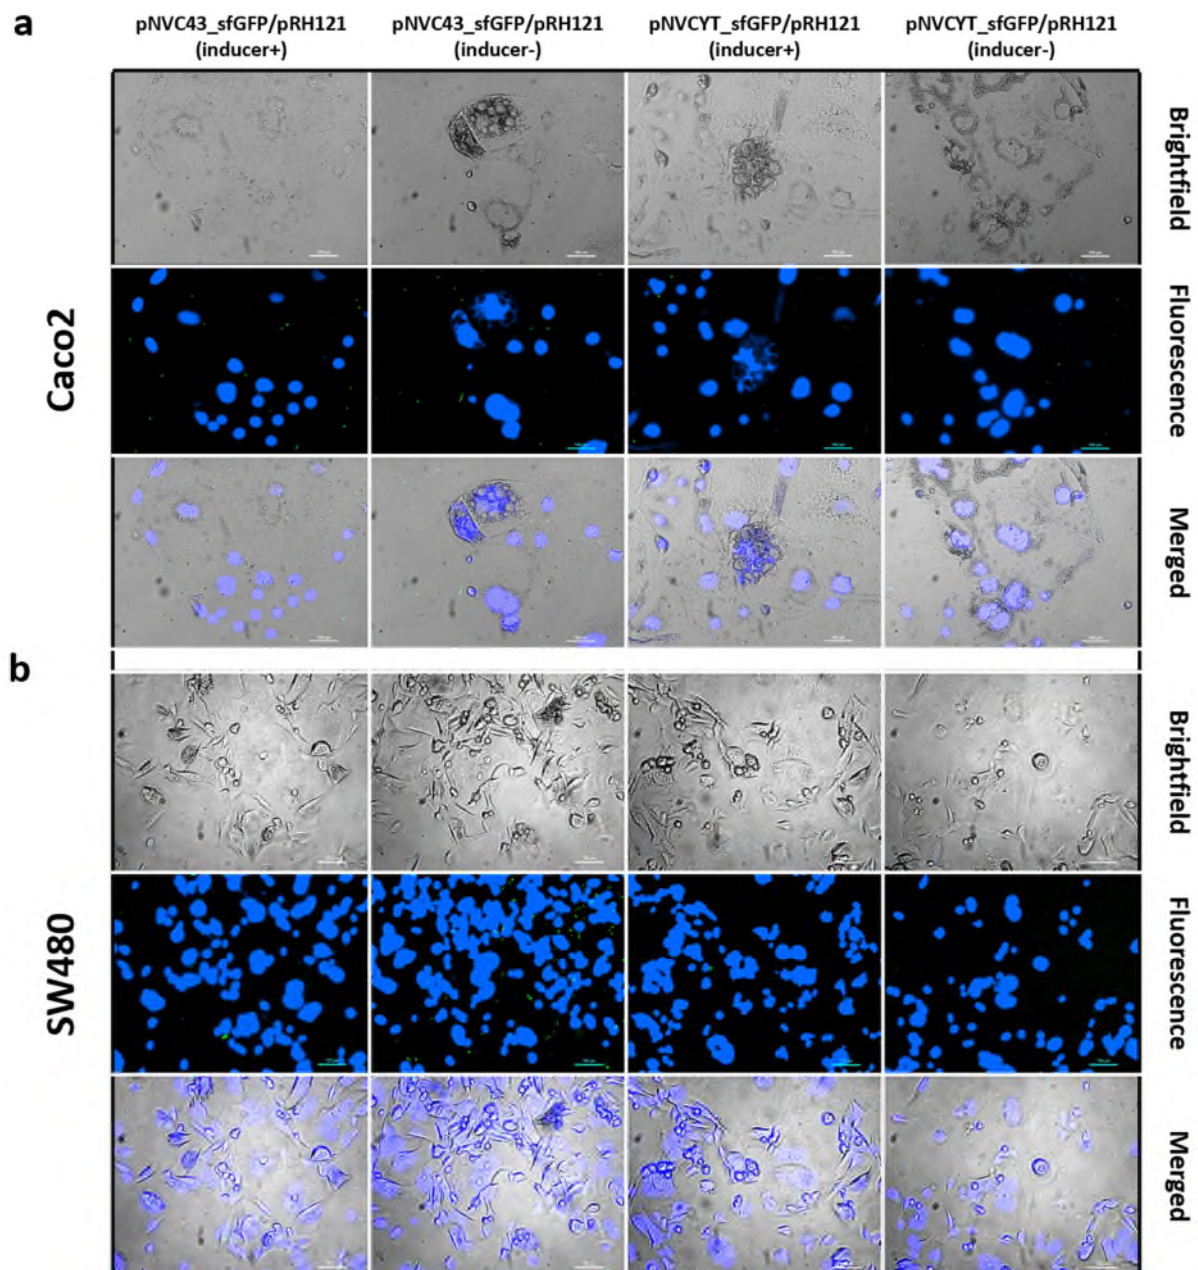

**Figure S8.** 0 hour (~within 5 minutes) incubation of programmed SimCell pYB1 carrying pNVC43\_sfGFP or pNVCYT\_sfGFP with (+) and without (-) the addition of inducer cocktail X (green). Bacterial cells under inducer+ are genome less and non-dividing SimCells. **(a)** Caco2 and **(b)** SW480 are the high CEA expressing and low CEA expressing colorectal cancer cell lines, respectively. Nuclei were stained with Hoechst dye (blue). Scale bar is 100  $\mu$ m.

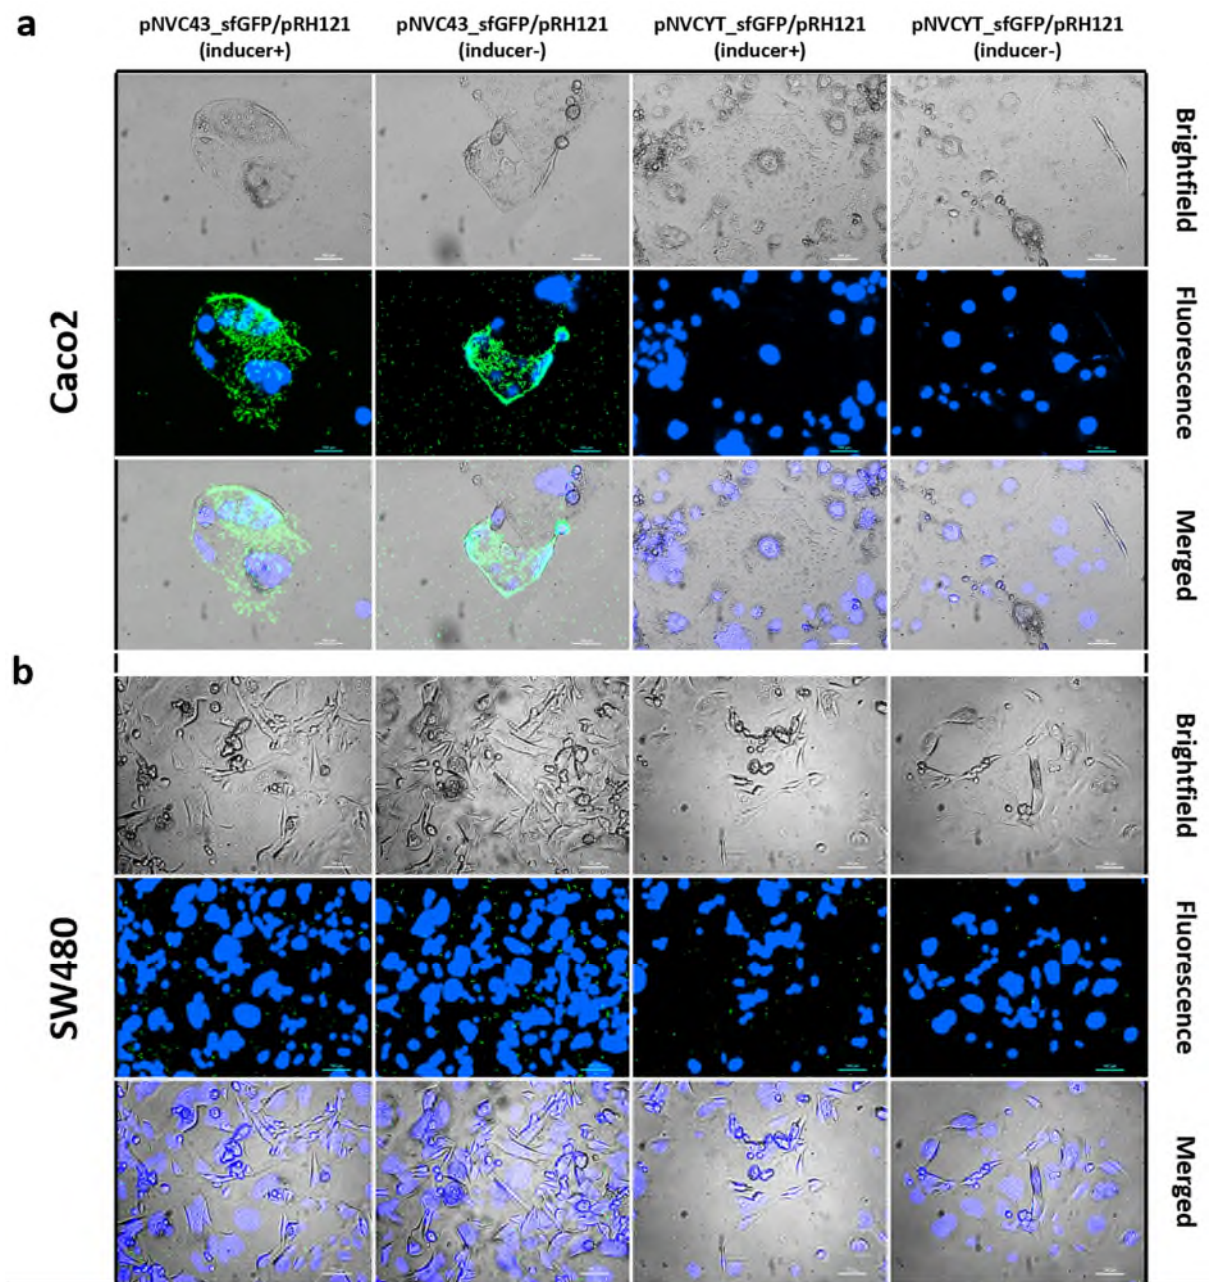

**Figure S9.** Time 4 hours incubation of programmed SimCell pYB1 carrying pNVC43\_sfGFP or pNVCYT\_sfGFP with (+) and without (-) the addition of inducer cocktail X (green). Bacterial cells under inducer+ are genome less and non-dividing SimCells. **(a)** Caco2 and **(b)** SW480 are the high CEA expressing and low CEA expressing colorectal cancer cell lines, respectively. Nuclei were stained with Hoechst dye (blue). Scale bar is 100  $\mu$ m.



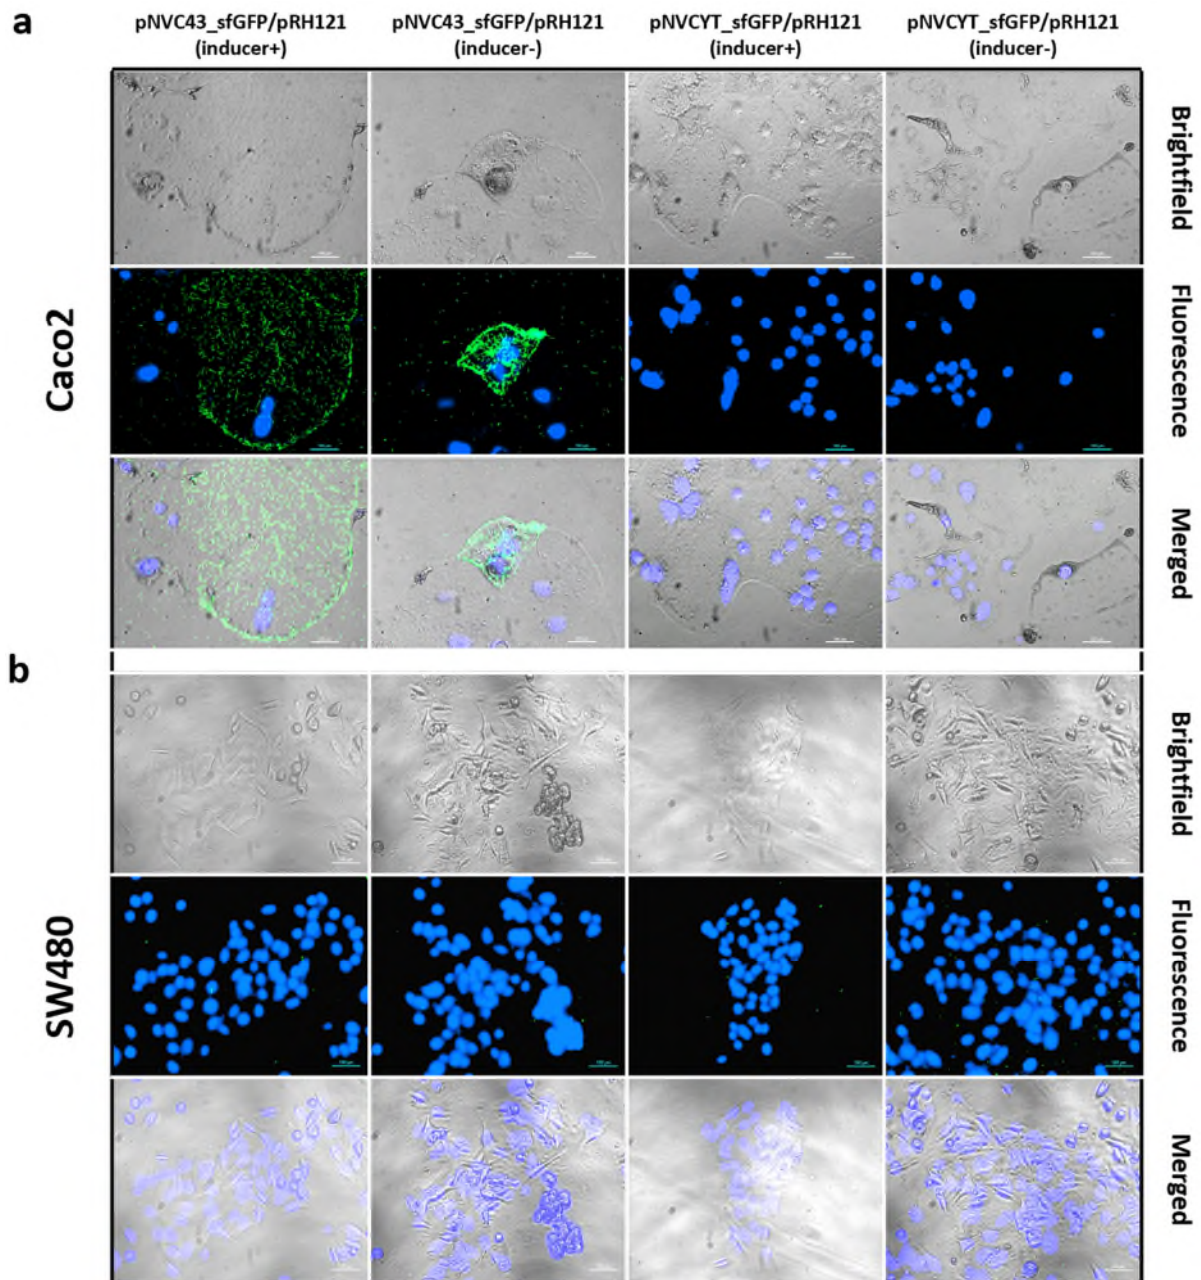

**Figure S10.** 8 hours incubation of programmed SimCell pYB1 carrying pNVC43\_sfGFP or pNVCYT\_sfGFP with (+) and without (-) the addition of inducer cocktail X (green). Bacterial cells under inducer+ are genome less and non-dividing SimCells. **(a)** Caco2 and **(b)** SW480 are the high CEA expressing and low CEA expressing colorectal cancer cell lines, respectively. Nuclei were stained with Hoechst dye (blue). Scale bar is 100  $\mu$ m.



(Please access the video here:

<https://1drv.ms/v/s!Atd6LwNkjPrwx158BYJ5FBiO6hxn?e=aladcC>)

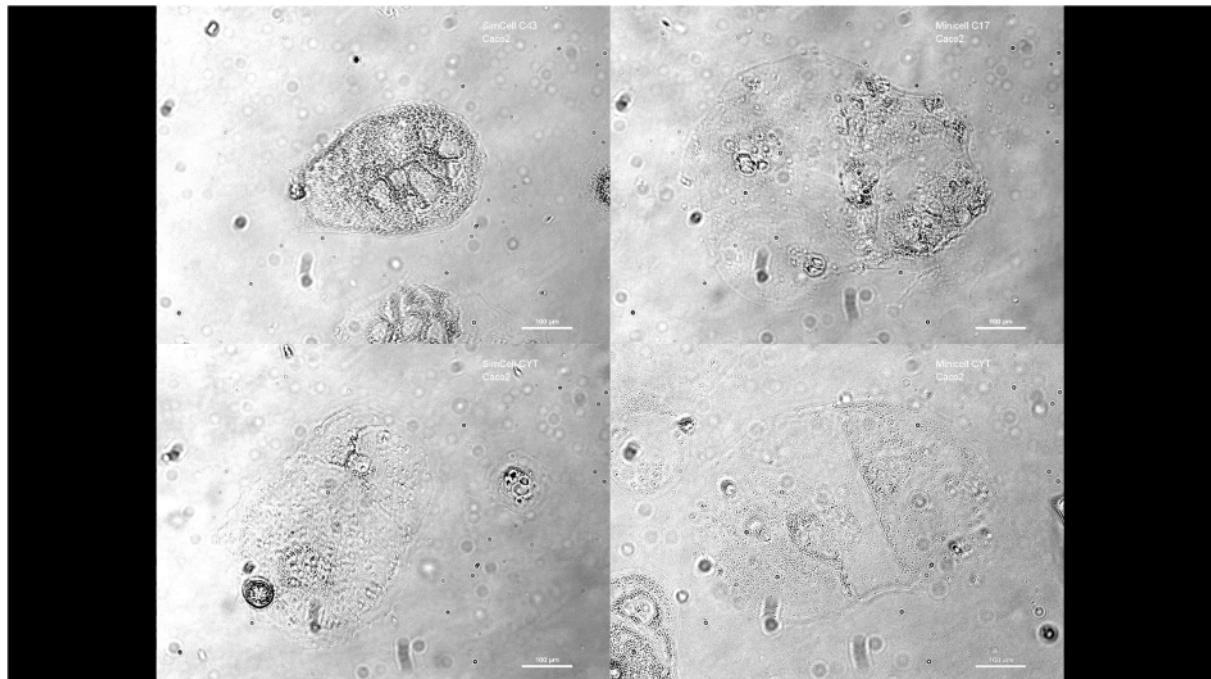

**Movie 1.** Time lapse video of Caco2 after 2 hours incubation with SimCell + pNVC43\_sfGFP (top left); SimCell + pNVCYT\_sfGFP (bottom left); minicell + pNVC17\_sfGFP (top right); minicell + pNVCYT\_sfGFP (bottom right). All cultures were washed thrice and added with fresh media supplemented with Ethidium homodimer prior to imaging. The duration of the experiment is labelled in hh:mm:ss format on the top left. SimCell and minicell are in green and the nuclei of Caco2 with compromised membrane were stained by Ethidium homodimer (red). Scale bar is 100  $\mu$ m.

## References

1. Pósfai, G. *et al.* Emergent Properties of Reduced-Genome Escherichia coli. *Science* **312**, 1044–1046 (2006).
2. Kyllilis, N. *et al.* Whole-Cell Biosensor with Tunable Limit of Detection Enables Low-Cost Agglutination Assays for Medical Diagnostic Applications. *ACS Sens.* **4**, 370–378 (2019).
3. Fan, C. *et al.* Chromosome-free bacterial cells are safe and programmable platforms for synthetic biology. *Proc. Natl. Acad. Sci.* **117**, 6752–6761 (2020).
4. Jensen, S. I., Lennen, R. M., Herrgård, M. J. & Nielsen, A. T. Seven gene deletions in seven days: Fast generation of Escherichia coli strains tolerant to acetate and osmotic stress. *Sci. Rep.* **5**, 17874 (2015).
5. Kaliberov, S. A. *et al.* Adenoviral targeting using genetically incorporated camelid single variable domains. *Lab Invest* **94**, 893–905 (2014).
6. Behar, G. *et al.* Llama single-domain antibodies directed against nonconventional epitopes of tumor-associated carcinoembryonic antigen absent from nonspecific cross-reacting antigen. *FEBS J.* **276**, 3881–3893 (2009).
7. Hanke, L. *et al.* An alpaca nanobody neutralizes SARS-CoV-2 by blocking receptor interaction. *Nat. Commun.* **11**, 4420 (2020).
